# Supplementary material for: Effect of the COVID-19 Pandemic on Cost-Related Prescription Nonredemption, Health care Seeking and Hospitalization in Hungary: A Nationally Representative Cross-Sectional Study
Source: Preprints.org preprint supplement (doi:10.20944/preprints202112.0422.v1), 2021-12-27
Supplement: Supplementary file 2 [file supplementary]

**Appendix Table S1** Stratum specific GP visit frequency in a year observed in prepandemic and pandemic periods

| Characteristics | | Prepandemic prevalence* | Pandemic prevalence* | OR (95%CI)** |
| --- | --- | --- | --- | --- |
| Age groups | 18-34 years | 766 (70.9) | 54 (33.3) | reference |
| 35-64 years | 2010 (75.3) | 326 (52.3) | **1.256 (1.093-1.444)** |
| 65+ years | 1475 (91.2) | 181 (83.4) | **4.761 (3.922-5.779)** |
| Sex | Female | 2415 (82.8) | 342 (57.7) | reference |
| Male | 1836 (74.9) | 219 (53.5) | **0.695 (0.620-0.78)** |
| COPD | No | 4039 (78.5) | 533 (55.1) | reference |
| Yes | 212 (94.2) | 28 (80.0) | **4.037 (2.549-6.393)** |
| IHD | No | 3935 (78.1) | 502 (53.7) | reference |
| Yes | 316 (95.5) | 59 (88.1) | **5.641 (3.688-8.628)** |
| Hypertension | No | 2455 (71.3) | 285 (41.2) | reference |
| Yes | 1796 (93.3) | 276 (88.7) | **6.428 (5.414-7.631)** |
| Diabetes mellitus | No | 3736 (77.4) | 421 (49.7) | reference |
| Yes | 515 (95.0) | 140 (90.3) | **5.687 (4.140-7.812)** |
| Cancer | No | 4143 (78.9) | 544 (55.5) | reference |
| Yes | 108 (93.9) | 17 (77.3) | **3.436 (1.895-6.230)** |
| Region | Central-Hungary | 1206 (78.7) | 150 (49.3) | reference |
| Central-Transdanubia | 482 (81.3) | 87 (79.1) | **1.506 (1.215-1.868)** |
| Northern-Great-Plain | 667 (79.8) | 84 (56.8) | 1.143 (0.955-1.369) |
| Northern-Hungary | 532 (79.0) | 64 (53.3) | 1.073 (0.886-1.300) |
| Southern-Great-Plain | 522 (79.1) | 58 (43.6) | 0.966 (0.800-1.166) |
| Southern-Transdanubia | 397 (78.1) | 50 (58.1) | 1.079 (0.871-1.335) |
| Western-Transdanubia | 445 (78.8) | 68 (67.3) | 1.189 (0.966-1.465) |
| Education level | Primary | 827 (80.8) | 121 (73.3) | reference |
| Vocational | 1026 (79.5) | 176 (57.0) | **0.768 (0.641-0.920)** |
| High school | 1456 (80.1) | 200 (50.3) | **0.753 (0.635-0.893)** |
| Tertiary | 942 (76.2) | 64 (49.2) | **0.710 (0.590-0.855)** |
| Marital status | Married | 2472 (79.5) | 295 (55.1) | reference |
| Single | 727 (70.9) | 72 (38.5) | **0.612 (0.532-0.705)** |
| Divorced | 345 (81.2) | 76 (51.0) | 0.873 (0.715-1.066) |
| Widowed | 621 (90.8) | 116 (92.1) | **3.204 (2.489-4.122)** |
| Married missed | 86 (69.9) | 2 (40.0) | NC |
| Etrhnicity | non-Roma | 4167 (79.4) | 529 (56.5) | reference |
| Roma | 76 (73.1) | 32 (49.2) | **0.563 (0.409-0.774)** |
| Roma missed | 8 (61.5) | 0 (0.0) | NC |

* number of cases (and proportion as %) of positive outcomes
** odds ratios with 95% confidence intervals from logistic regression models
NC- not computable

**Appendix Table S2** Stratum specific specialist visit frequency in a year observed in prepandemic and pandemic periods

| Characteristics | | Prepandemic prevalence* | Pandemic prevalence* | OR (95%CI)** |
| --- | --- | --- | --- | --- |
| Age groups | 18-34 years | 585 (55.2) | 35 (22.2) | reference |
| 35-64 years | 1664 (62.7) | 208 (33.5) | **1.288 (1.128-1.469)** |
| 65+ years | 1177 (73.0) | 135 (62.5) | **2.448 (2.104-2.849)** |
| Sex | Female | 2001 (69.0) | 232 (39.5) | reference |
| Male | 1425 (58.9) | 146 (35.9) | **0.703 (0.635-0.778)** |
| COPD | No | 3228 (63.3) | 355 (37.0) | reference |
| Yes | 198 (88.4) | 23 (65.7) | **4.017 (2.837-5.689)** |
| IHD | No | 3131 (62.7) | 329 (35.5) | reference |
| Yes | 295 (89.1) | 49 (73.1) | **4.527 (3.383-6.060)** |
| Hypertension | No | 1966 (57.8) | 191 (27.9) | reference |
| Yes | 1460 (76.0) | 187 (60.5) | **2.533 (2.263-2.836)** |
| Diabetes mellitus | No | 2965 (62.0) | 271 (32.3) | reference |
| Yes | 461 (85.2) | 107 (69.5) | **3.298 (2.701-4.026)** |
| Cancer | No | 3319 (63.7) | 363 (37.3) | reference |
|  | Yes | 107 (94.7) | 15 (68.2) | **6.372 (3.589-11.313)** |
| Region | Central-Hungary | 1075 (70.6) | 98 (32.2) | reference |
| Central-Transdanubia | 374 (63.4) | 64 (58.2) | 0.932 (0.778-1.116) |
| Northern-Great-Plain | 519 (62.6) | 65 (44.5) | **0.833 (0.710-0.977)** |
| Northern-Hungary | 420 (63.3) | 31 (27.0) | **0.769 (0.648-0.913)** |
| Southern-Great-Plain | 397 (60.4) | 37 (27.8) | **0.680 (0.574-0.805)** |
| Southern-Transdanubia | 300 (59.8) | 34 (39.5) | **0.733 (0.607-0.886)** |
| Western-Transdanubia | 341 (61.0) | 49 (49.0) | **0.808 (0.674-0.970)** |
| Education level | Primary | 614 (60.1) | 84 (51.5) | reference |
| Vocational | 790 (61.6) | 115 (37.3) | 0.920 (0.790-1.071) |
| High school | 1177 (65.6) | 145 (36.8) | 1.062 (0.919-1.226) |
| Tertiary | 845 (69.0) | 34 (26.4) | **1.288 (1.097-1.513)** |
| Martal status | Married | 2054 (66.6) | 203 (38.0) | reference |
| Single | 533 (52.5) | 42 (23.0) | **0.556 (0.487-0.634)** |
| Divorced | 293 (69.3) | 49 (33.3) | 0.905 (0.755-1.084) |
| Widowed | 475 (69.5) | 82 (65.6) | **1.338 (1.136-1.576)** |
| Married missed | 71 (60.7) | 2 (40.0) | NC |
| Etrhnicity | non-Roma | 3372 (64.7) | 354 (38.1) | reference |
| Roma | 47 (46.1) | 24 (37.5) | **0.484 (0.354-0.661)** |
| Roma missed | 7 (58.3) | 0 (0.0) | NC |

* number of cases (and proportion as %) of positive outcomes
** odds ratios with 95% confidence intervals from logistic regression models
NC- not computable

**Appendix Table S3** Stratum specific hospital admission frequency in a year observed in prepandemic and pandemic periods

| Characteristics | | Prepandemic prevalence* | Pandemic prevalence* | OR (95%CI)** |
| --- | --- | --- | --- | --- |
| Age groups | 18-34 years | 84 (7.7) | 10 (6.2) | reference |
| 35-64 years | 296 (11.0) | 24 (3.9) | **1.321 (1.039-1.679)** |
| 65+ years | 348 (21.4) | 34 (15.7) | **3.234 (2.548-4.105)** |
| Sex | Female | 424 (14.4) | 41 (6.9) | reference |
| Male | 304 (12.3) | 27 (6.6) | **0.854 (0.735-0.993)** |
| COPD | No | 662 (12.8) | 60 (6.2) | reference |
| Yes | 66 (29.3) | 8 (22.9) | **2.990 (2.259-3.957)** |
| IHD | No | 602 (11.9) | 53 (5.7) | reference |
| Yes | 126 (38.1) | 15 (22.4) | **4.485 (3.597-5.594)** |
| Hypertension | No | 340 (9.8) | 29 (4.2) | reference |
| Yes | 388 (20.1) | 39 (12.5) | **2.429 (2.090-2.822)** |
| Diabetes mellitus | No | 600 (12.3) | 37 (4.4) | reference |
| Yes | 128 (23.7) | 31 (20.0) | **2.359 (1.941-2.867)** |
| Cancer | No | 677 (12.8) | 58 (5.9) | reference |
| Yes | 51 (44.3) | 10 (45.5) | **6.045 (4.279-8.541)** |
| Region | Central-Hungary | 196 (12.7) | 13 (4.3) | reference |
| Central-Transdanubia | 85 (14.3) | 12 (10.9) | 1.255 (0.969-1.625) |
| Northern-Great-Plain | 115 (13.7) | 7 (4.7) | 1.108 (0.873-1.406) |
| Northern-Hungary | 99 (14.6) | 13 (10.9) | **1.286 (1.005-1.645)** |
| Southern-Great-Plain | 99 (14.9) | 8 (6.1) | 1.218 (0.949-1.563) |
| Southern-Transdanubia | 69 (13.5) | 8 (9.3) | 1.160 (0.878-1.534) |
| Western-Transdanubia | 65 (11.5) | 7 (6.9) | 0.950 (0.715-1.262) |
| Education level | Primary | 199 (19.4) | 22 (13.3) | reference |
| Vocational | 182 (14) | 24 (7.8) | **0.646 (0.526-0.795)** |
| High school | 207 (11.3) | 17 (4.3) | **0.489 (0.400-0.598)** |
| Tertiary | 140 (11.2) | 5 (3.8) | **0.517 (0.412-0.647)** |
| Martal status | Married | 404 (12.9) | 31 (5.8) | reference |
| Single | 87 (8.4) | 9 (4.8) | **0.630 (0.500-0.794)** |
| Divorced | 71 (16.6) | 9 (6.1) | 1.197 (0.926-1.547) |
| Widowed | 150 (21.9) | 19 (15.1) | **1.953 (1.604-2.378)** |
| Married missed | 16 (12.6) | 0 (0.0) | NC |
| Etrhnicity | non-Roma | 705 (13.3) | 62 (6.6) | reference |
| Roma | 20 (19.2) | 6 (9.2) | 1.294 (0.846-1.979) |
| Roma missed | 3 (23.1) | 0 (0.0) | NC |

* number of cases (and proportion as %) of positive outcomes
** odds ratios with 95% confidence intervals from logistic regression models
NC- not computable

**Appendi****x TableS4** Stratum specific CRPNR frequency in a year observed in prepandemic and pandemic periods

| **Characteristics** | | **Prepandemic prevalence*** | **Pandemic prevalence*** | **OR (95%CI)**** |
| --- | --- | --- | --- | --- |
| **Age groups** | 18-34 years | 49 (6.6) | 3 (3.4) | reference |
| 35-64 years | 105 (5.0) | 15 (3.8) | 0.760 (0.544-1.063) |
| 65+ years | 91 (6.1) | 18 (8.6) | 1.023 (0.727-1.438) |
| **Sex** | Female | 142 (5.8) | 24 (5.7) | reference |
| Male | 103 (5.5) | 12 (4.4) | 0.918 (0.719-1.172) |
| **COPD** | No | 220 (5.3) | 32 (4.9) | reference |
| Yes | 25 (11.7) | 4 (12.5) | **2.402 (1.598-3.612)** |
| **IHD** | No | 209 (5.2) | 26 (4.1) | reference |
| Yes | 36 (11.0) | 10 (15.9) | **2.505 (1.793-3.501)** |
| **Hypertension** | No | 131 (5.3) | 14 (3.6) | reference |
| Yes | 114 (6.1) | 22 (7.2) | 1.260 (0.99-1.603) |
| **Diabetes mellitus** | No | 196 (5.1) | 15 (2.8) | reference |
| Yes | 49 (9.3) | 21 (13.8) | **2.258 (1.701-2.998)** |
| **Cancer** | No | 239 (5.7) | 32 (4.8) | reference |
| Yes | 6 (5.5) | 4 (21.1) | 1.448 (0.750-2.792) |
| **Region** | Central-Hungary | 67 (5.4) | 10 (5.0) | reference |
| Central-Transdanubia | 21 (4.5) | 1 (1.1) | 0.734 (0.452-1.192) |
| Northern-Great-Plain | 52 (7.8) | 13 (12.7) | **1.639 (1.164-2.309)** |
| Northern-Hungary | 43 (7.7) | 2 (2.6) | 1.347 (0.921-1.97) |
| Southern-Great-Plain | 36 (6.6) | 2 (2.1) | 1.117 (0.749-1.667) |
| Southern-Transdanubia | 19 (4.6) | 4 (7.5) | 0.922 (0.572-1.486) |
| Western-Transdanubia | 7 (1.6) | 4 (5.6) | **0.387 (0.204-0.735)** |
| **Education level** | Primary | 83 (9.5) | 23 (16.4) | reference |
| Vocational | 49 (4.7) | 8 (3.7) | **0.405 (0.290-0.565)** |
| High school | 81 (5.6) | 5 (2.0) | **0.455 (0.338-0.612)** |
| Tertiary | 32 (3.3) | (0.0) | **0.266 (0.177-0.399)** |
| **Marital status** | Married | 126 (5.0) | 10 (2.7) | reference |
| Single | 44 (6.2) | 4 (4.0) | 1.287 (0.917-1.806) |
| Divorced | 25 (7.1) | 9 (8.7) | **1.636 (1.108-2.415)** |
| Widowed | 44 (7.0) | 13 (10.9) | **1.676 (1.217-2.308)** |
| Married missed | 6 (6.2) | 0 (0.0) | NC |
| **Ethinicity** | non-Roma | 230 (5.4) | 28 (4.3) | reference |
| Roma | 14 (16.1) | 8 (18.2) | **3.624 (2.254-5.828)** |
| Roma missed | 1 (16.7) | 0 (0.0) | NC |

** number of cases (and proportion as %) of positive outcomes
** odds ratios with 95% confidence intervals from logistic regression models
NC- not computable*
